# Supplementary material for: Prognostic Nutritional Index as a Predictor of Mortality Risk in Breast Cancer Survivors: A Population-Based Study
Source: Research Square preprint supplement (doi:10.21203/rs.3.rs-8399826/v1), 2026-01-22
Supplement: Supplementary file 1 [file 073ec91d018b48ce4c10b9a3.docx]

**Prognostic Nutritional Index as a Predictor of** **Mortality** **Risk in Breast Cancer** **Survivors: A Population-Based Study**

**Supplementary Methods**

**Covariates**
Laboratory indicators include white blood cells (LBXWBCSI), neutrophil count (LBDNENO), neutrophil percentage (LBXNEPCT), lymphocytes (LBDLYMNO), platelets (LBXPLTSI), serum albumin (LBDSALSI), and serum total calcium (LBDSCASI). Self-reported questionnaire items include smoking status (SMQ020), hypertension (BPD020), diabetes (DIQ010), heart attack (MCQ160E), stroke (MCQ160F), ever told you had cancer or malignancy (MCQ220), and what kind of cancer (MCQ230A).

**Table S1. Association with between PNI with all-cause and cancer mortality in breast cancer survivors.**

| **Characteristics** | **PNI** | | | |
| --- | --- | --- | --- | --- |
| **Tertile 1 (35-48)** | **Tertile 2 (48-52)** | **Tertile 3 (52-68)** | ***P* Value** |
| **Na** | 151 (31.53%) | 166 (34.66%) | 162 (33.82%) |  |
| **Estimated N** | 914489 | 1133008 | 983538 |  |
| **PNI** | 45.55 (45.19, 45.90) | 50.30 (50.06, 50.54) | 55.58 (54.96, 56.21) | <0.001 |
| **Age** | 69.94 (67.83, 72.05) | 63.69 (61.65, 65.72) | 64.14 (61.75, 66.54) | <0.001 |
| **Race/ethnicity (%)** |  |  |  | 0.988 |
| Mexican American | 3.81 | 3.24 | 3.49 |  |
| Other Hispanic | 1.78 | 3.02 | 3.00 |  |
| Non-Hispanic White | 82.71 | 83.87 | 82.50 |  |
| Non-Hispanic Black | 7.00 | 6.72 | 6.95 |  |
| Other Race | 4.70 | 3.15 | 4.05 |  |
| **Education level (%)** |  |  |  | 0.709 |
| Less than 9th grade | 3.57 | 4.94 | 5.32 |  |
| 9-11th grade | 12.51 | 6.25 | 6.56 |  |
| High school graduate | 18.11 | 22.83 | 24.92 |  |
| Some college or AA degree | 28.33 | 31.60 | 26.13 |  |
| College graduate or above | 37.48 | 34.39 | 37.07 |  |
| **Smoke (%)** |  |  |  | 0.075 |
| Yes | 28.76 | 38.72 | 44.14 |  |
| No | 71.24 | 61.28 | 55.86 |  |
| **Heart attack (%)** |  |  |  | 0.948 |
| Yes | 6.76 | 7.35 | 8.20 |  |
| No | 93.24 | 92.65 | 91.80 |  |
| **Stroke (%)** |  |  |  | 0.826 |
| Yes | 8.45 | 6.67 | 6.46 |  |
| No | 91.55 | 93.33 | 93.54 |  |
| **Hypertension (%)** |  |  |  | 0.817 |
| Yes | 49.07 | 50.22 | 53.42 |  |
| No | 50.93 | 49.78 | 46.58 |  |
| **Diabetes (%)** |  |  |  | 0.528 |
| Yes | 17.07 | 18.11 | 22.89 |  |
| No | 82.93 | 81.89 | 77.11 |  |
| **Laboratory data** |  |  |  |  |
| Albumin (g/L) | 38.83 (38.33, 39.34) | 41.66 (41.24, 42.08) | 43.14 (42.59, 43.69) | <0.001 |
| Lymphocyte number (10⁹/L) | 1.34 (1.25, 1.43) | 1.73 (1.64, 1.82) | 2.49 (2.34, 2.63) | <0.001 |
| White blood cell count (10⁹/L) | 6.29 (5.92, 6.66) | 6.68 (6.22, 7.14) | 7.81 (7.31, 8.32) | <0.001 |
| Segmented neutrophils percent (%) | 64.99 (63.50, 66.48) | 60.97 (59.29, 62.64) | 55.73 (54.02, 57.44) | <0.001 |
| Platelet (10⁹/L) | 231.86 (219.17, 244.55) | 243.80 (231.47, 256.13) | 260.23 (248.34, 272.11) | <0.001 |
| Total calcium (mmol/L) | 2.32 (2.31, 2.34) | 2.37 (2.36, 2.39) | 2.39 (2.37, 2.41) | <0.001 |
| **Follow-up time (years)** | 5.70 (4.83, 6.56) | 6.56 (5.76, 7.37) | 6.27 (5.47, 7.07) | <0.001 |

**
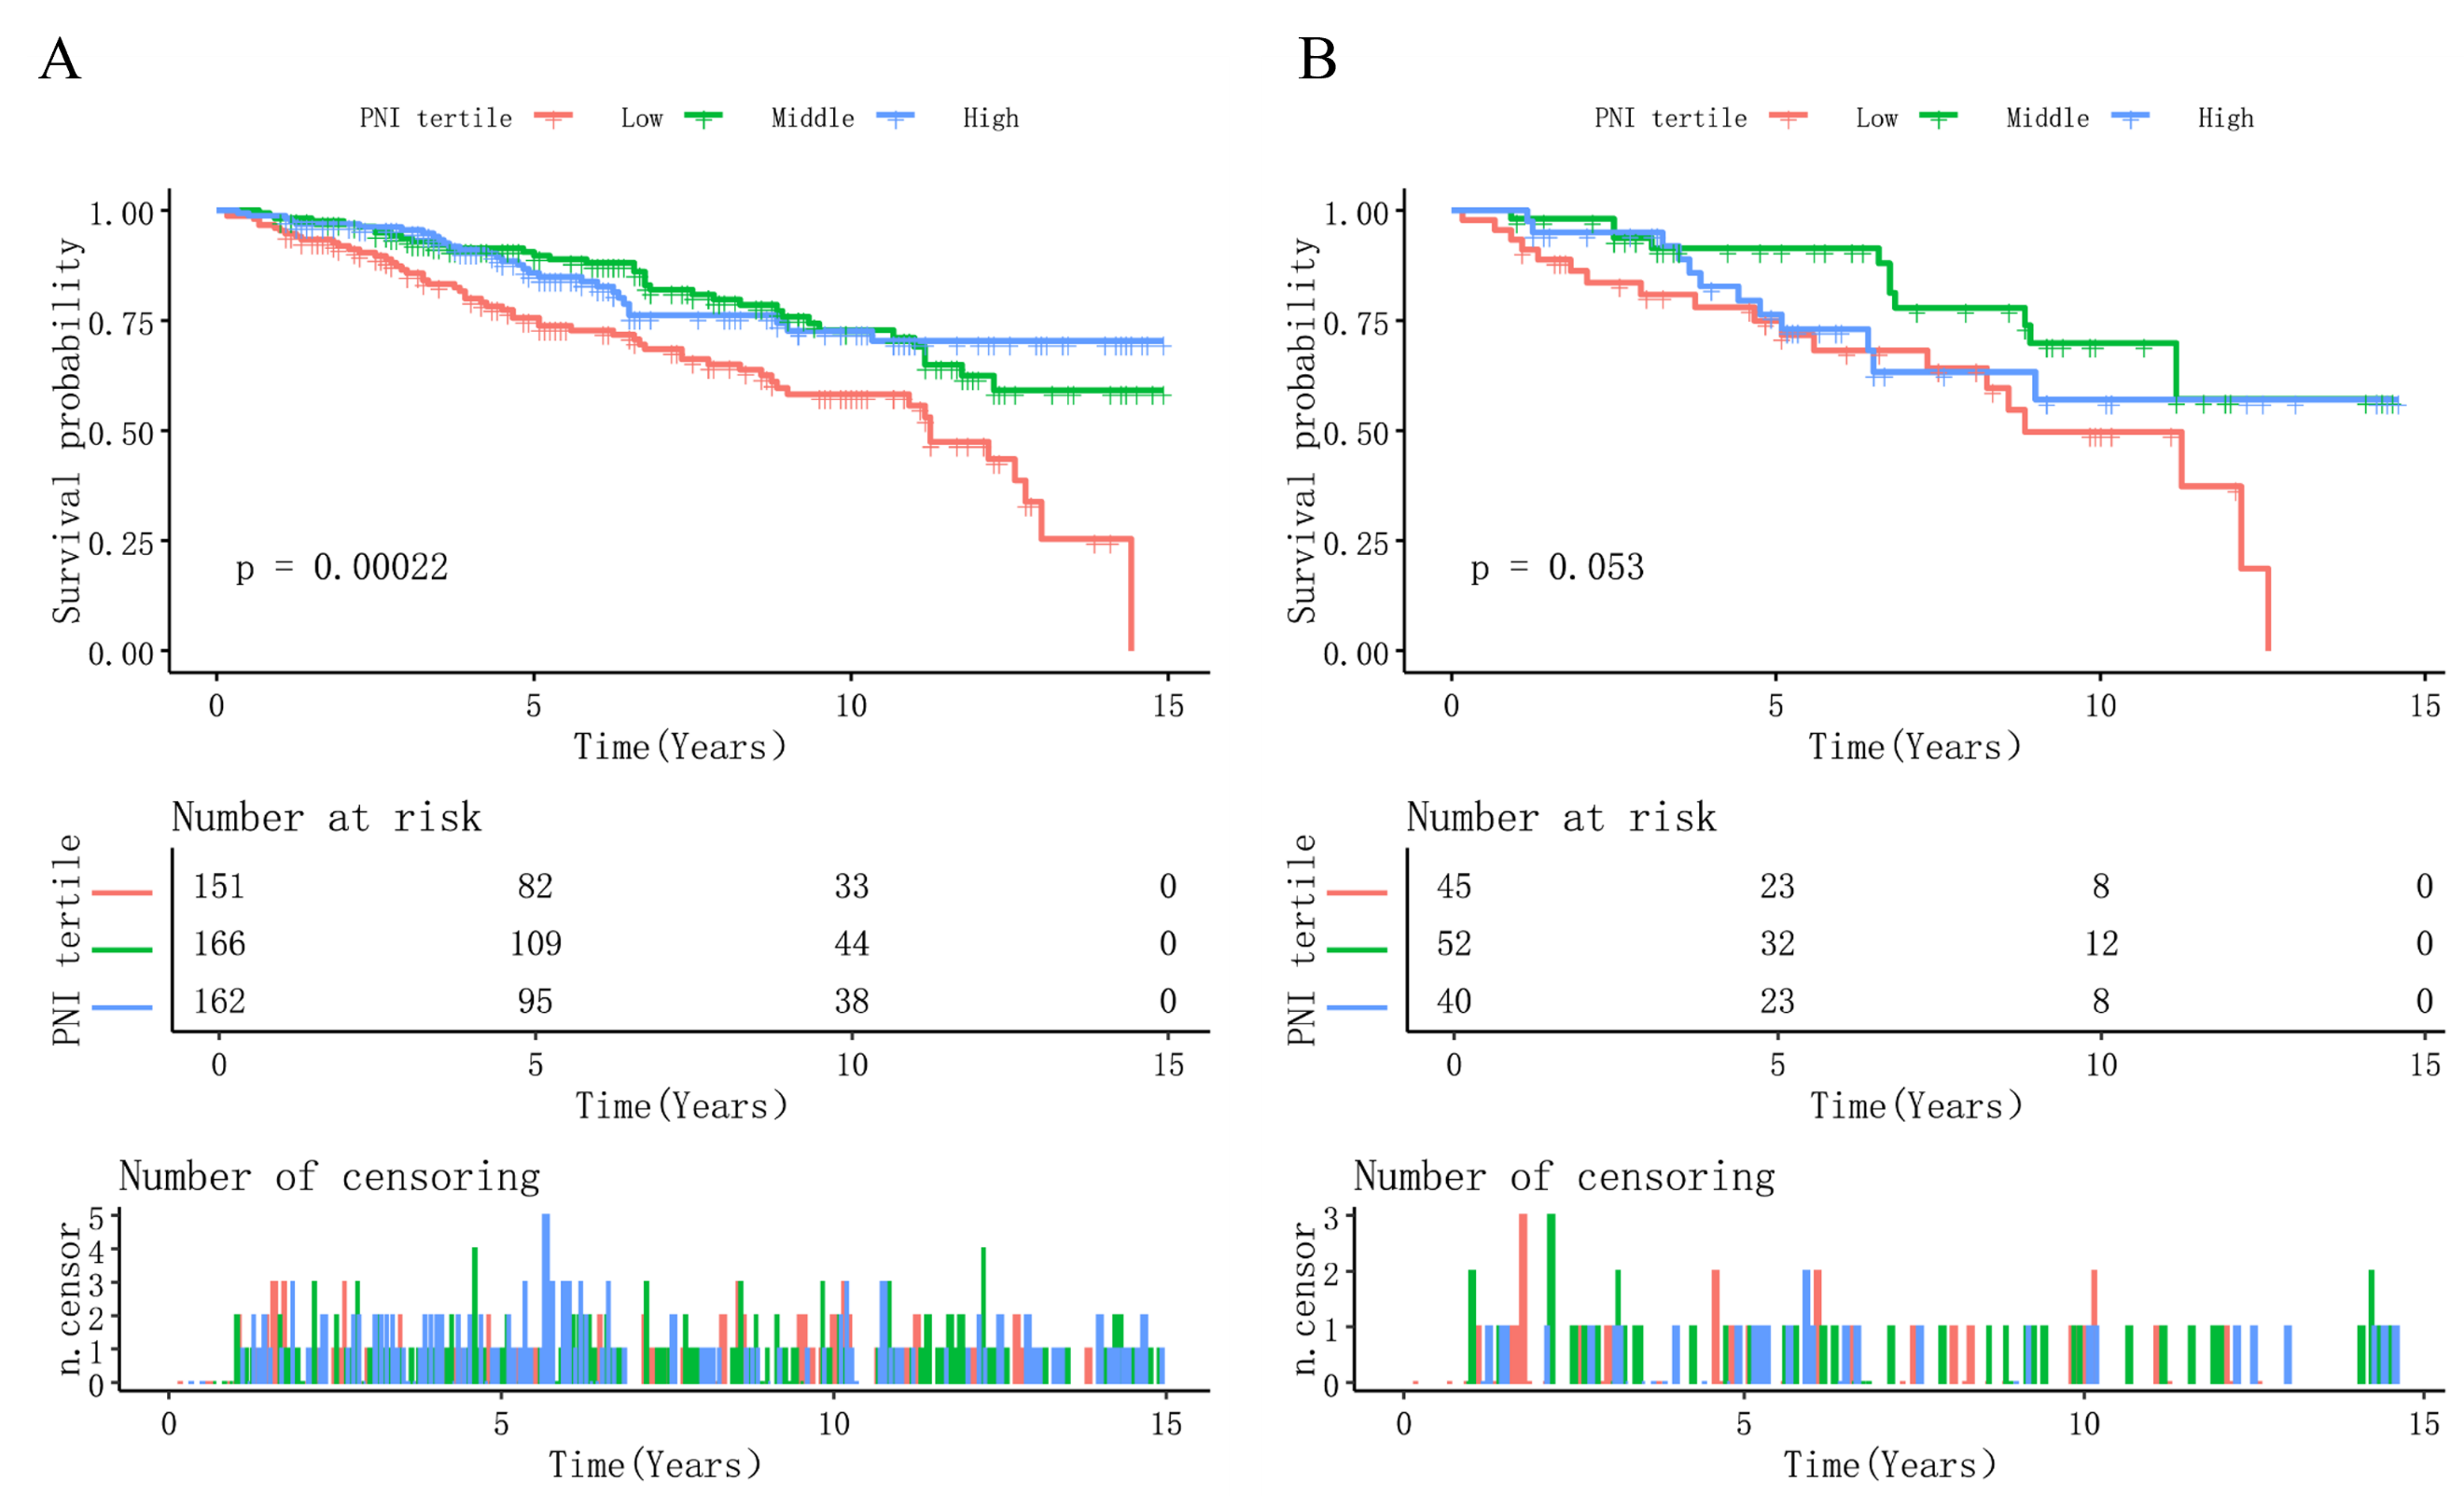
**

**Figure S1. Kaplan–Meier survival analysis demonstrated mortality risk in breast cancer survivors stratified by PNI quartiles. A.** All-cause mortality; **B.** Cancer mortality


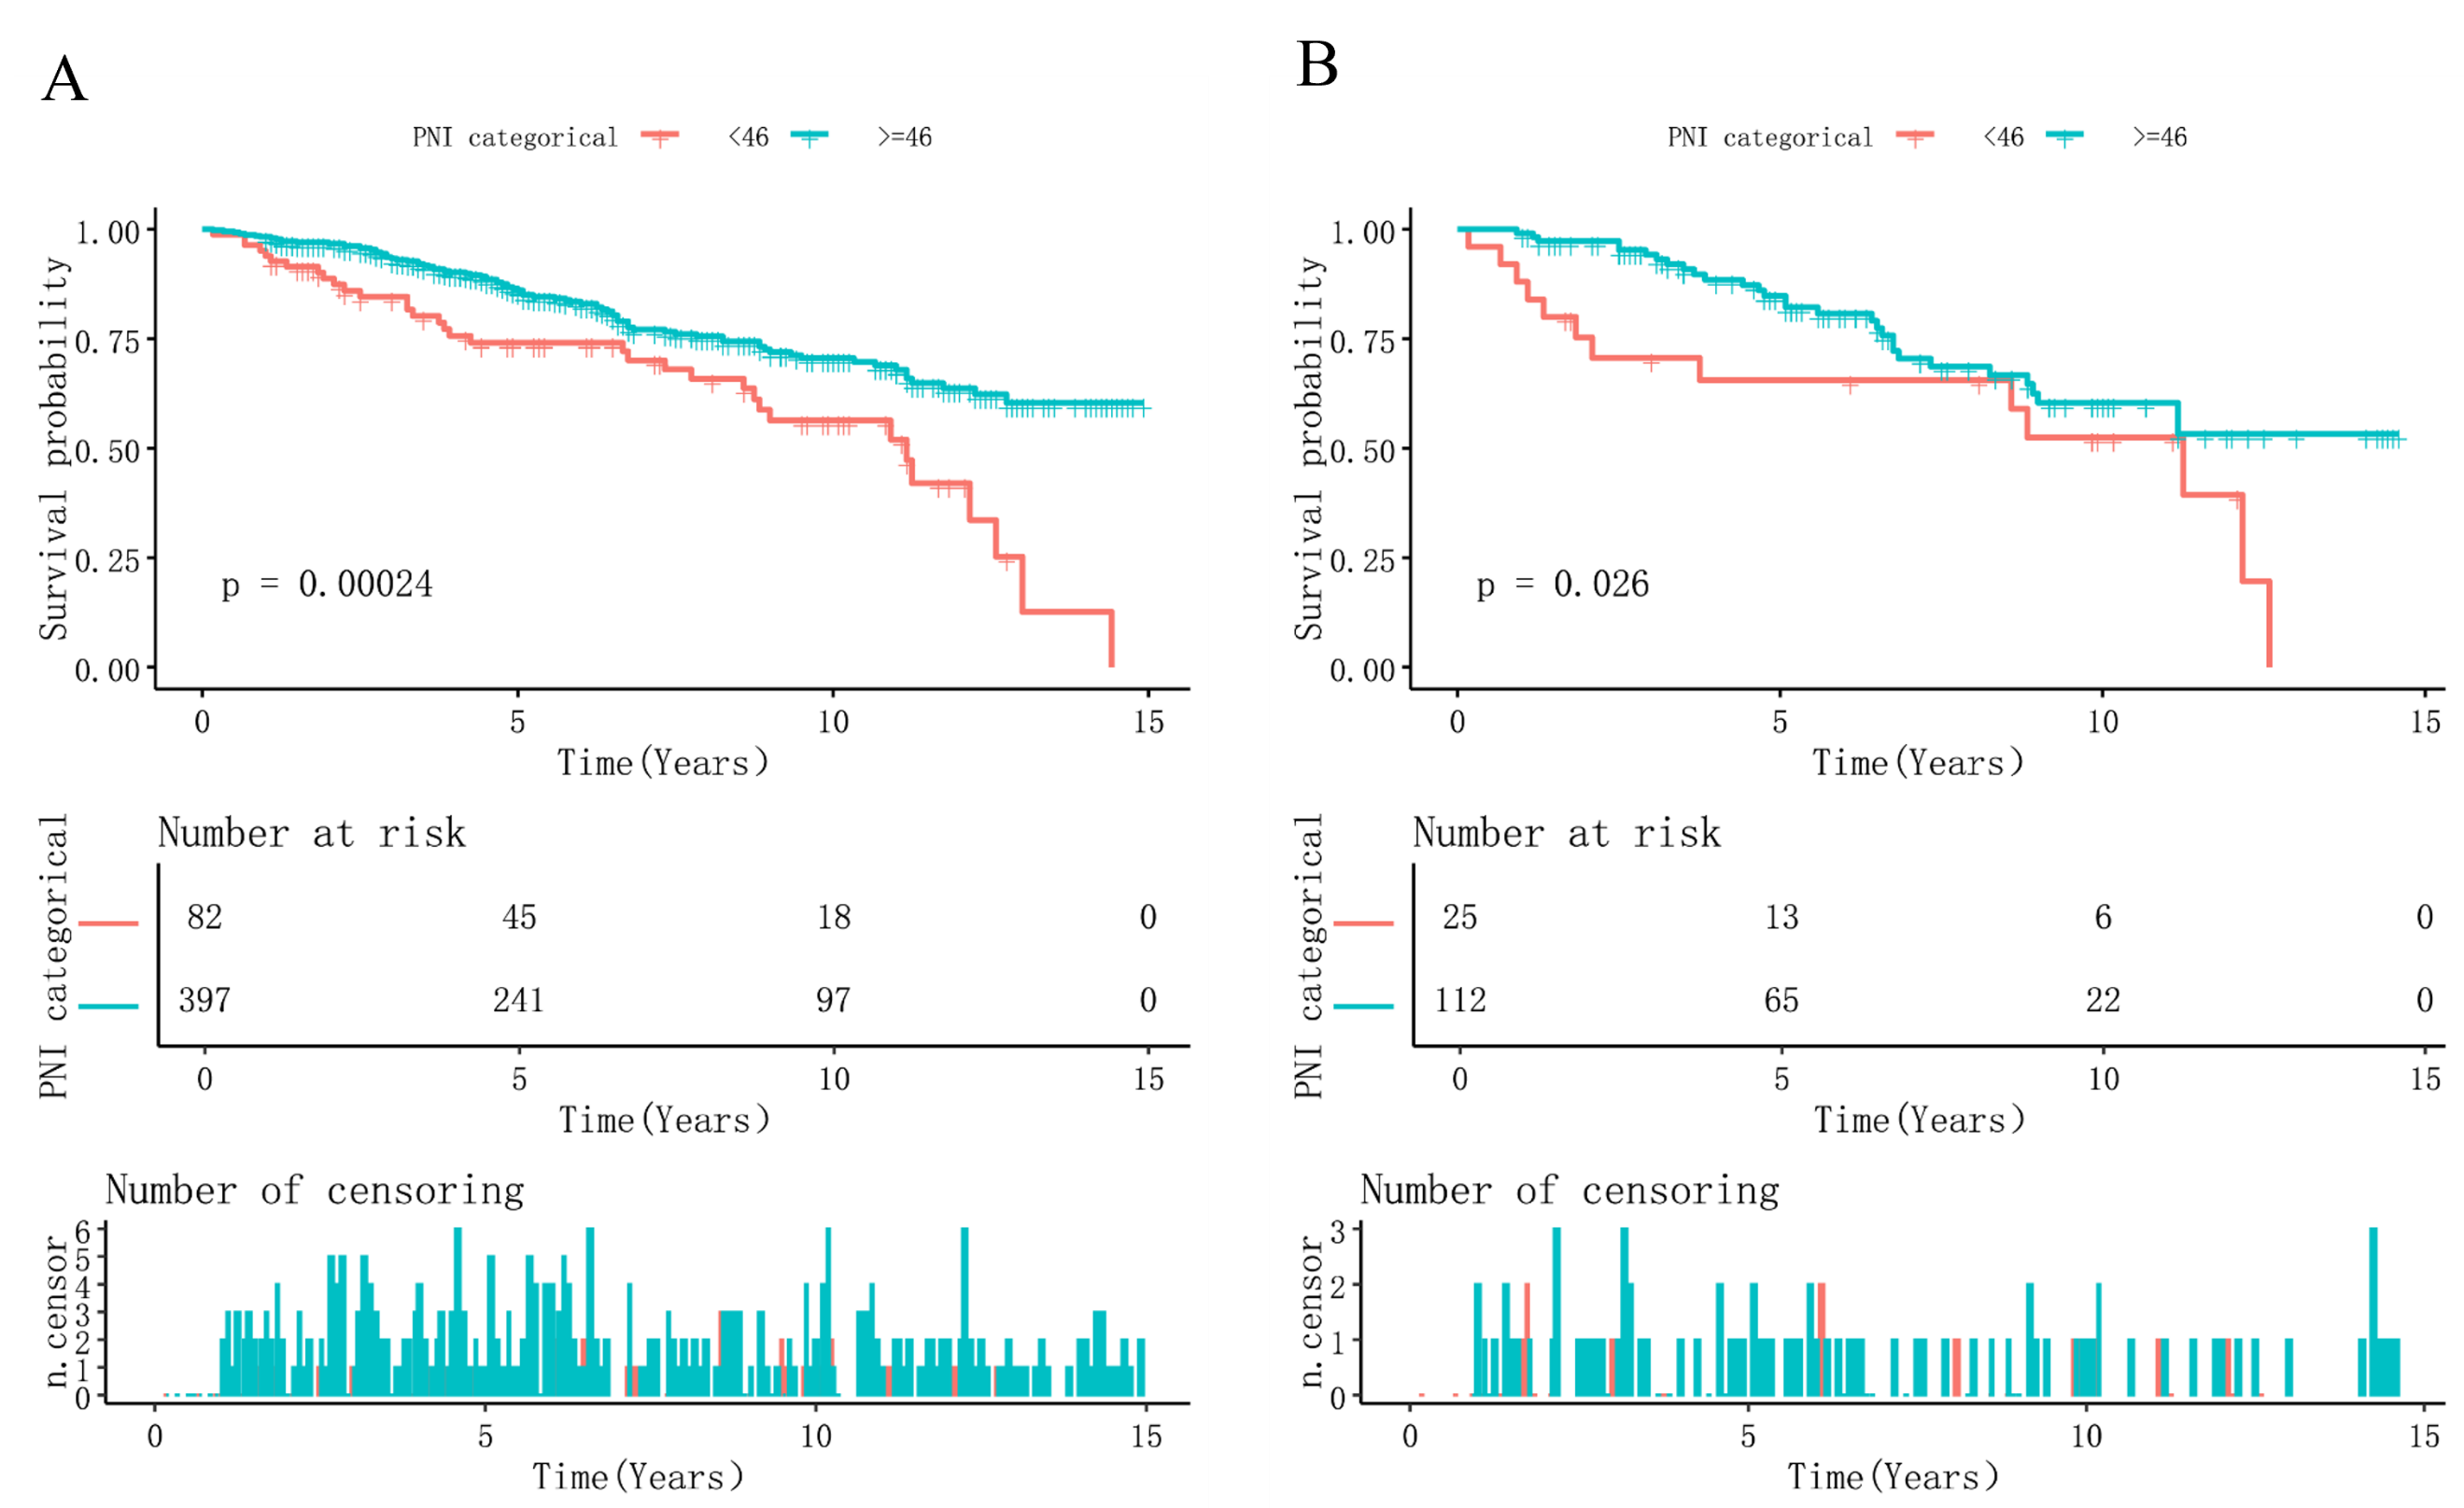


**Figure S2. Kaplan–Meier survival analysis demonstrated mortality risk in breast cancer survivors stratified by inflection point of PNI.**
